# Supplementary material
Source: PubMed Central journal article supplement (PMC2784201)

**Cu(I)-Catalyzed Diamination of Conjugated Olefins with Tunable Anionic Counterions. A Possible Approach to Asymmetric Diamination**

**Baoguo Zhao, Haifeng Du, and Yian Shi\***

*Department of Chemistry  
Colorado State University  
Fort Collins, CO 80523*

**Supporting Information**

Table of Contents

|                                                       |     |
|-------------------------------------------------------|-----|
| General method                                        | S-2 |
| Characterization data                                 | S-2 |
| The data for the determination of enantiomeric excess | S-5 |
| NMR spectra                                           | S-8 |

**General Methods.** All commercially available reagents and solvents were used without further purification. Chromatography was performed on silica gel (200-400 mesh) column.  $^1\text{H}$  NMR spectra were recorded on 300 MHz NMR spectrometer and  $^{13}\text{C}$  NMR spectra were recorded on 100 MHz NMR spectrometer. IR spectra were recorded on a FT-IR spectrometer. Melting points were uncorrected.

**Table 2, entry 1**

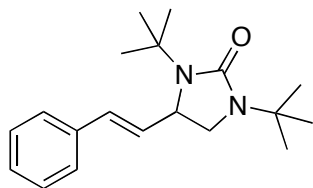

White solid; mp 157-158 °C;  $[\alpha]_{\text{D}}^{25} = +13.9$  ( $c$  1.0,  $\text{CHCl}_3$ ) (55% ee); IR (film) 1673  $\text{cm}^{-1}$ ;  $^1\text{H}$  NMR (300 MHz,  $\text{CDCl}_3$ )  $\delta$  7.41-7.23 (m, 5H), 6.50 (d,  $J = 16.2$  Hz, 1H), 6.36 (dd,  $J = 16.2$ , 8.4 Hz, 1H), 4.17 (dt,  $J = 8.4$ , 2.1 Hz, 1H), 3.44 (t,  $J = 8.4$  Hz, 1H), 3.01 (dd,  $J = 8.4$ , 2.1 Hz, 1H), 1.38 (s, 9H), 1.33 (s, 9H);  $^{13}\text{C}$  NMR (75 MHz,  $\text{CDCl}_3$ )  $\delta$  160.7, 136.6, 131.7, 130.8, 128.8, 128.0, 126.5, 55.4, 53.9, 53.1, 48.3, 29.0, 27.5.

Du, H.; Zhao, B.; Yuan, W.; Shi, Y. *Org. Lett.* **2008**, *10*, 4231.

**Table 2, entry 2**

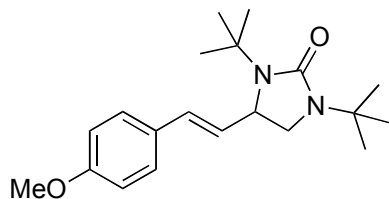

White solid; mp 111-112 °C;  $[\alpha]_{\text{D}}^{25} = +17.0$  ( $c$  1.0,  $\text{CHCl}_3$ ) (58% ee); IR (film) 1690  $\text{cm}^{-1}$ ;  $^1\text{H}$  NMR (300 MHz,  $\text{CDCl}_3$ )  $\delta$  7.31 (ddd,  $J = 8.4$ , 3.0, 1.8 Hz, 2H), 6.87 (ddd,  $J = 8.4$ , 3.0, 1.8 Hz, 2H), 6.43 (d,  $J = 16.2$  Hz, 1H), 6.22 (dd,  $J = 16.2$ , 8.7 Hz, 1H), 4.14 (ddd,  $J = 8.7$ , 8.1, 2.4 Hz, 1H), 3.81 (s, 3H), 3.42 (t,  $J = 8.1$  Hz, 1H), 3.00 (dd,  $J = 8.1$ , 2.4 Hz, 1H), 1.37 (s, 9H), 1.33 (s, 9H);  $^{13}\text{C}$  NMR (75 MHz,  $\text{CDCl}_3$ )  $\delta$  160.7, 159.5, 130.2, 129.45, 129.39, 127.7, 114.2, 55.52, 55.46, 53.9, 53.1, 48.4, 29.0, 27.5.

Du, H.; Zhao, B.; Yuan, W.; Shi, Y. *Org. Lett.* **2008**, *10*, 4231.

**Table 2, entry 3**

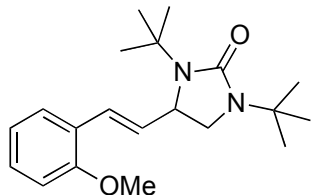

White solid; mp 122-123 °C;  $[\alpha]_D^{25} = +27.5$  (*c* 1.0, CHCl<sub>3</sub>) (61% ee); IR (film) 1691 cm<sup>-1</sup>; <sup>1</sup>H NMR (300 MHz, CDCl<sub>3</sub>) δ 7.44 (dd, *J* = 7.8, 1.8 Hz, 1H), 7.24 (dt, *J* = 7.8, 1.5 Hz, 1H), 6.94 (t, *J* = 7.2 Hz, 1H), 6.88 (d, *J* = 8.4 Hz, 1H), 6.83 (d, *J* = 16.2 Hz, 1H), 6.36 (dd, *J* = 16.2, 9.0 Hz, 1H), 4.18 (ddd, *J* = 9.0, 7.8, 2.4 Hz, 1H), 3.85 (s, 3H), 3.43 (dd, *J* = 8.4, 7.8 Hz, 1H), 3.02 (dd, *J* = 8.4, 2.4 Hz, 1H), 1.39 (s, 9H), 1.32 (s, 9H); <sup>13</sup>C NMR (75 MHz, CDCl<sub>3</sub>) δ 160.7, 156.7, 132.2, 129.0, 126.7, 125.6, 125.4, 120.8, 111.0, 55.9, 55.6, 53.9, 53.0, 48.4, 29.0, 27.6.

Du, H.; Zhao, B.; Yuan, W.; Shi, Y. *Org. Lett.* **2008**, *10*, 4231.

**Table 2, entry 4**

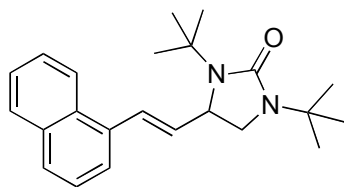

White solid; mp 129-130 °C;  $[\alpha]_D^{25} = +17.4$  (*c* 1.0, CHCl<sub>3</sub>) (49% ee); IR (film) 1689 cm<sup>-1</sup>; <sup>1</sup>H NMR (300 MHz, CDCl<sub>3</sub>) δ 8.07 (dd, *J* = 7.2, 2.1 Hz, 1H), 7.86 (dd, *J* = 6.9, 2.1 Hz, 1H), 7.81 (d, *J* = 7.8 Hz, 1H), 7.60 (d, *J* = 7.2 Hz, 1H), 7.65-7.44 (m, 3H), 7.29 (d, *J* = 15.6 Hz, 1H), 6.42 (dd, *J* = 15.6, 8.7 Hz, 1H), 4.32 (ddd, *J* = 8.7, 8.1, 2.1 Hz, 1H), 3.51 (dd, *J* = 8.4, 8.1 Hz, 1H), 3.11 (dd, *J* = 8.4, 2.1 Hz, 1H), 1.45 (s, 9H), 1.35 (s, 9H); <sup>13</sup>C NMR (75 MHz, CDCl<sub>3</sub>) δ 160.6, 134.8, 134.3, 133.7, 131.2, 128.8, 128.3, 128.0, 126.3, 126.0, 125.8, 124.0, 123.6, 55.5, 54.0, 53.1, 48.3, 29.1, 27.6.

Du, H.; Zhao, B.; Yuan, W.; Shi, Y. *Org. Lett.* **2008**, *10*, 4231.

**Table 2, entry 5**

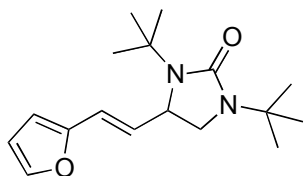

White solid; mp 143-144 °C;  $[\alpha]_D^{25} = +8.4$  (*c* 1.0, CHCl<sub>3</sub>) (49% ee); IR (film) 1675 cm<sup>-1</sup>; <sup>1</sup>H NMR (300 MHz, CDCl<sub>3</sub>) 7.35 (d, *J* = 1.8 Hz, 1H), 6.37 (dd, *J* = 3.3, 1.8 Hz, 1H), 6.31-6.29 (m, 2H), 6.24 (d, *J* = 3.3 Hz, 1H), 4.14-4.07 (m, 1H), 3.42 (t, *J* = 8.1 Hz, 1H), 2.96 (dd, *J* = 8.4, 2.4 Hz, 1H), 1.37 (s, 9H), 1.32 (s, 9H); <sup>13</sup>C NMR (75 MHz, CDCl<sub>3</sub>) 160.6, 152.2, 142.3, 130.4, 119.2, 111.5, 108.2, 55.0, 53.9, 53.1, 48.3, 28.9, 27.5.

Du, H.; Zhao, B.; Yuan, W.; Shi, Y. *Org. Lett.* **2008**, *10*, 4231.

**Table 2, entry 6**

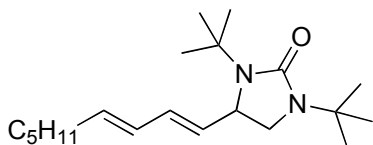

Colorless oil;  $[\alpha]_D^{25} = +1.0$  (*c* 1.0, CHCl<sub>3</sub>) (55% ee); IR (film) 1694 cm<sup>-1</sup>; <sup>1</sup>H NMR (300 MHz, CDCl<sub>3</sub>) δ 6.13-5.96 (m, 2H), 5.75-5.63 (m, 2H), 3.98 (dt, *J* = 8.4, 2.4 Hz, 1H), 3.36 (t, *J* = 8.1 Hz, 1H), 2.92 (dd, *J* = 8.1, 2.4 Hz, 1H), 2.12-2.04 (m, 2H), 1.40-1.24 (m, 24H), 0.90 (t, *J* = 7.2 Hz, 3H); <sup>13</sup>C NMR (75 MHz, CDCl<sub>3</sub>) δ 160.7, 135.8, 132.7, 131.3, 129.3, 55.1, 53.8, 53.0, 48.4, 32.8, 31.6, 29.0, 28.9, 27.6, 22.7, 14.2.

Du, H.; Zhao, B.; Yuan, W.; Shi, Y. *Org. Lett.* **2008**, *10*, 4231.

The chromatograms for the determination of enantioselectivity

Table 2, entry 1

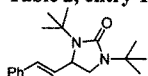

HPLC Conditions: Column: Chiralpak AD-H (Column No. ADH0CE-FD069), Daicel Chemical Industries, Ltd.. Eluent: Hexanes/IPA (98/2); Flow rate: 1.0 mL/min; Detection: UV220 nm

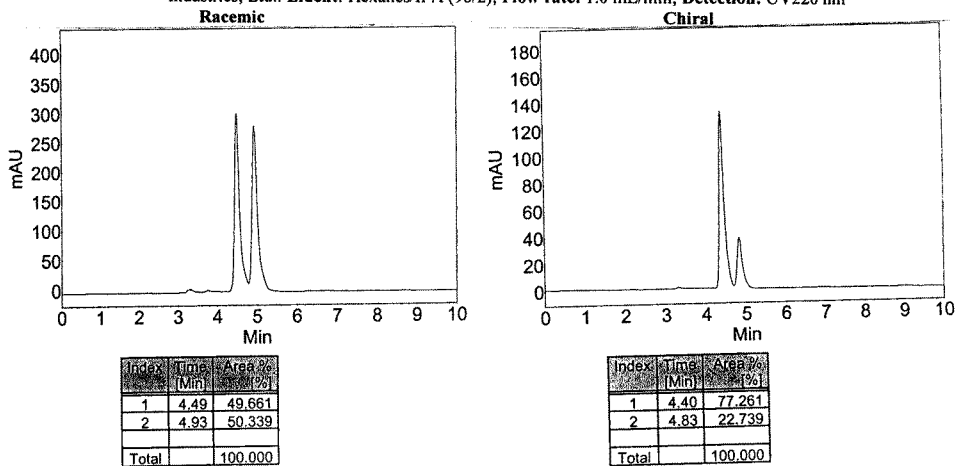

Table 2, entry 2

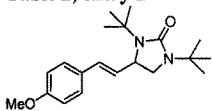

HPLC Conditions: Column: Chiralpak AD-H (Column No. ADH0CE-FD069), Daicel Chemical Industries, Ltd.. Eluent: Hexanes/IPA (98/2); Flow rate: 1.0 mL/min; Detection: UV220 nm

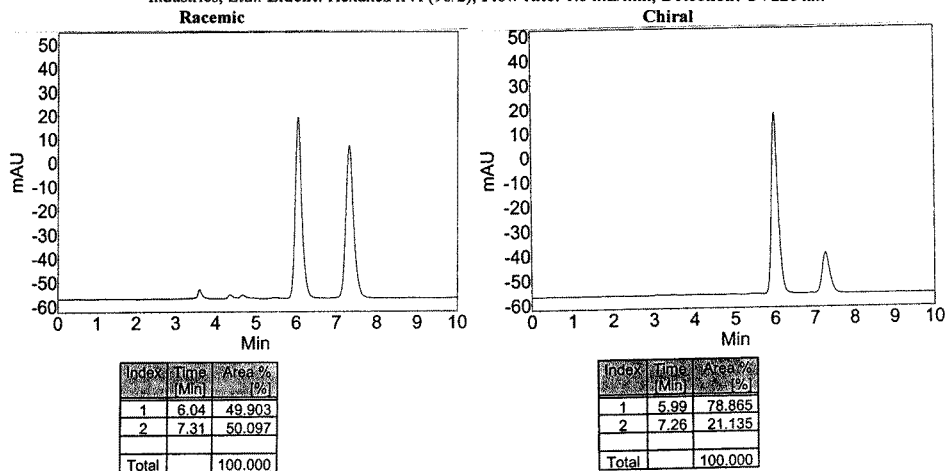

Table 2, entry 3

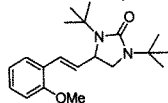

HPLC Conditions: Column: Chiralpak AD-H (Column No. ADH0CE-FD069), Daicel Chemical Industries, Ltd.. Eluent: Hexanes/IPA (200/1); Flow rate: 1.0 mL/min; Detection: UV220 nm

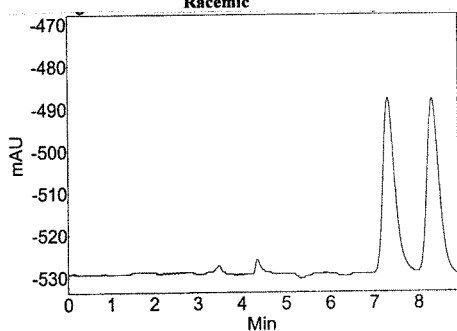

| Index | Time (Min) | Area (%) |
|-------|------------|----------|
| 1     | 7.31       | 49.607   |
| 2     | 8.32       | 50.393   |
| Total |            | 100.000  |

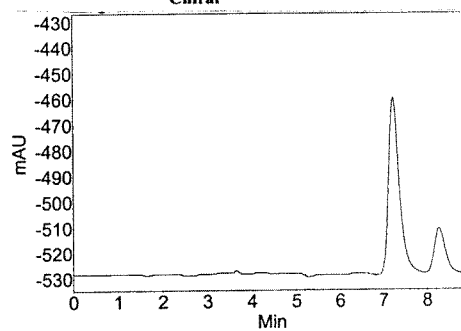

| Index | Time (Min) | Area (%) |
|-------|------------|----------|
| 1     | 7.23       | 80.394   |
| 2     | 8.25       | 19.606   |
| Total |            | 100.000  |

Table 2, entry 4

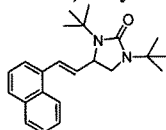

HPLC Conditions: Column: Chiralpak AD-H (Column No. ADH0CE-FD069), Daicel Chemical Industries, Ltd.. Eluent: Hexanes/IPA (98/2); Flow rate: 1.0 mL/min; Detection: UV220 nm

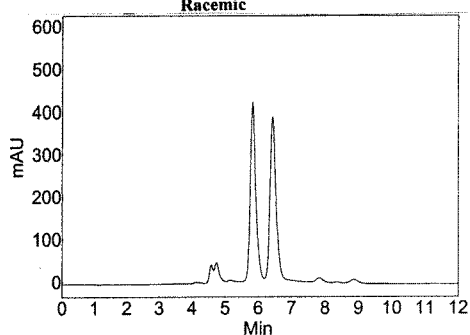

| Index | Time (Min) | Area (%) |
|-------|------------|----------|
| 1     | 5.82       | 49.777   |
| 2     | 6.42       | 50.223   |
| Total |            | 100.000  |

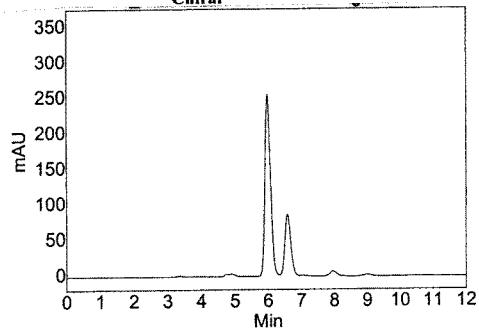

| Index | Time (Min) | Area (%) |
|-------|------------|----------|
| 1     | 5.98       | 74.602   |
| 2     | 6.58       | 25.398   |
| Total |            | 100.000  |

Table 2, entry 5

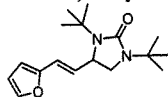

HPLC Conditions: Column: Chiralpak AD-H (Column No. ADH0CE-FD069), Daicel Chemical Industries, Ltd.. Eluent: Hexanes/IPA (98/2); Flow rate: 1.0 mL/min; Detection: UV220 nm

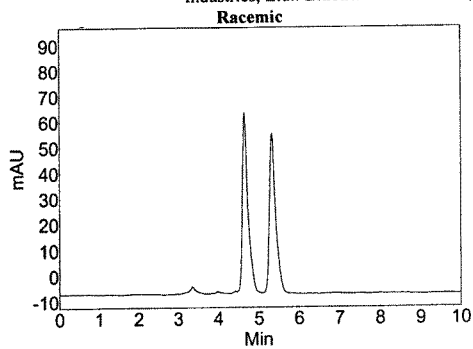

| Index | Time [Min] | Area [%] |
|-------|------------|----------|
| 1     | 4.65       | 50.261   |
| 2     | 5.33       | 49.739   |
| Total |            | 100.000  |

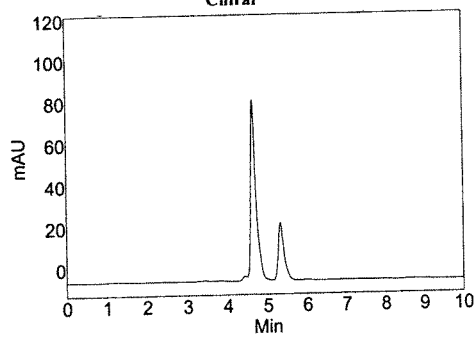

| Index | Time [Min] | Area [%] |
|-------|------------|----------|
| 2     | 4.64       | 74.607   |
| 1     | 5.32       | 25.393   |
| Total |            | 100.000  |

Table 2, entry 6

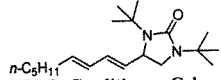

HPLC Conditions: Column: Chiralpak AD-H (Column No. ADH0CE-FD069), Daicel Chemical Industries, Ltd.. Eluent: Hexanes/IPA (99/1); Flow rate: 1.0 mL/min; Detection: UV220 nm

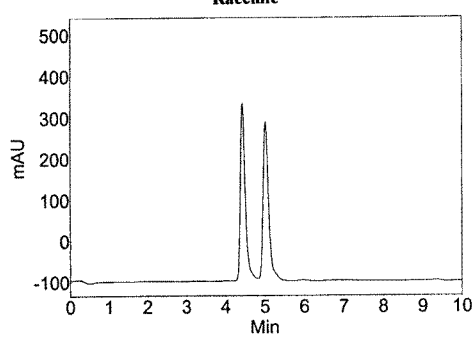

| Index | Time [Min] | Area [%] |
|-------|------------|----------|
| 1     | 4.43       | 49.882   |
| 2     | 5.02       | 50.118   |
| Total |            | 100.000  |

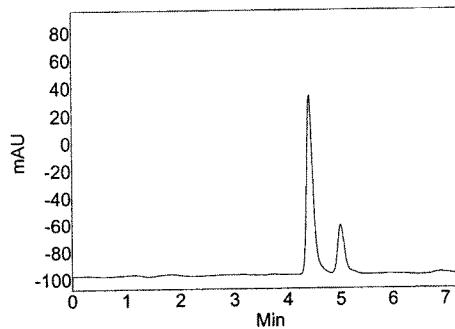

| Index | Time [Min] | Area [%] |
|-------|------------|----------|
| 1     | 4.41       | 77.632   |
| 2     | 5.00       | 22.368   |
| Total |            | 100.000  |

Table 2, Entry 1

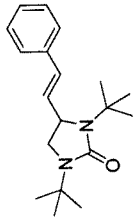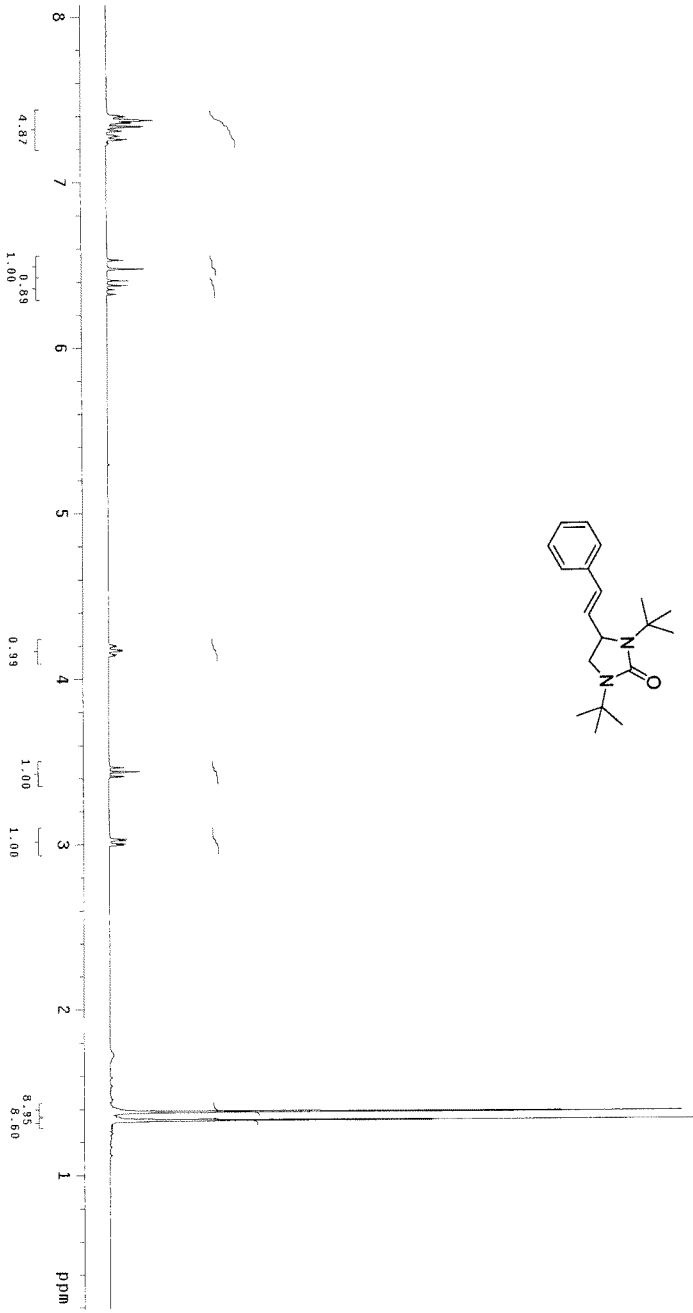



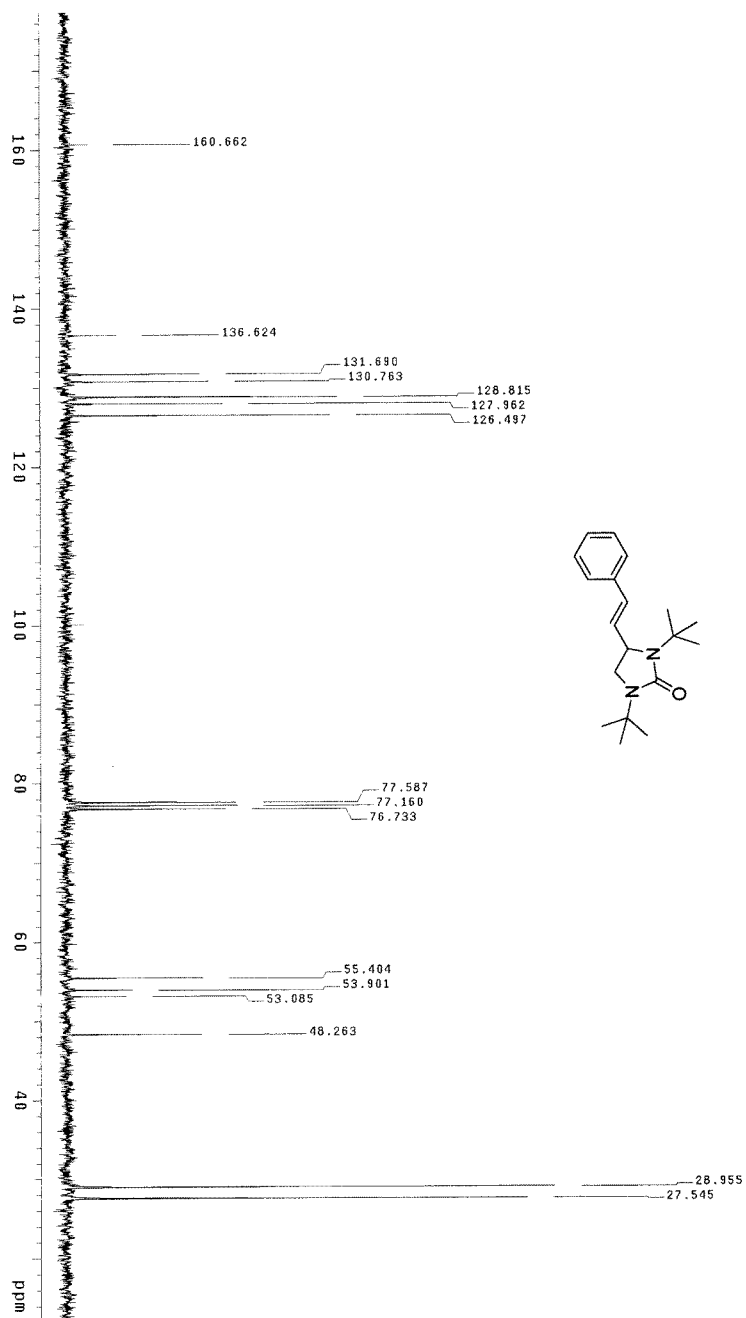

Table 2, Entry 1

Table 2, Entry 2

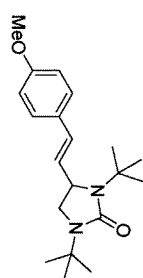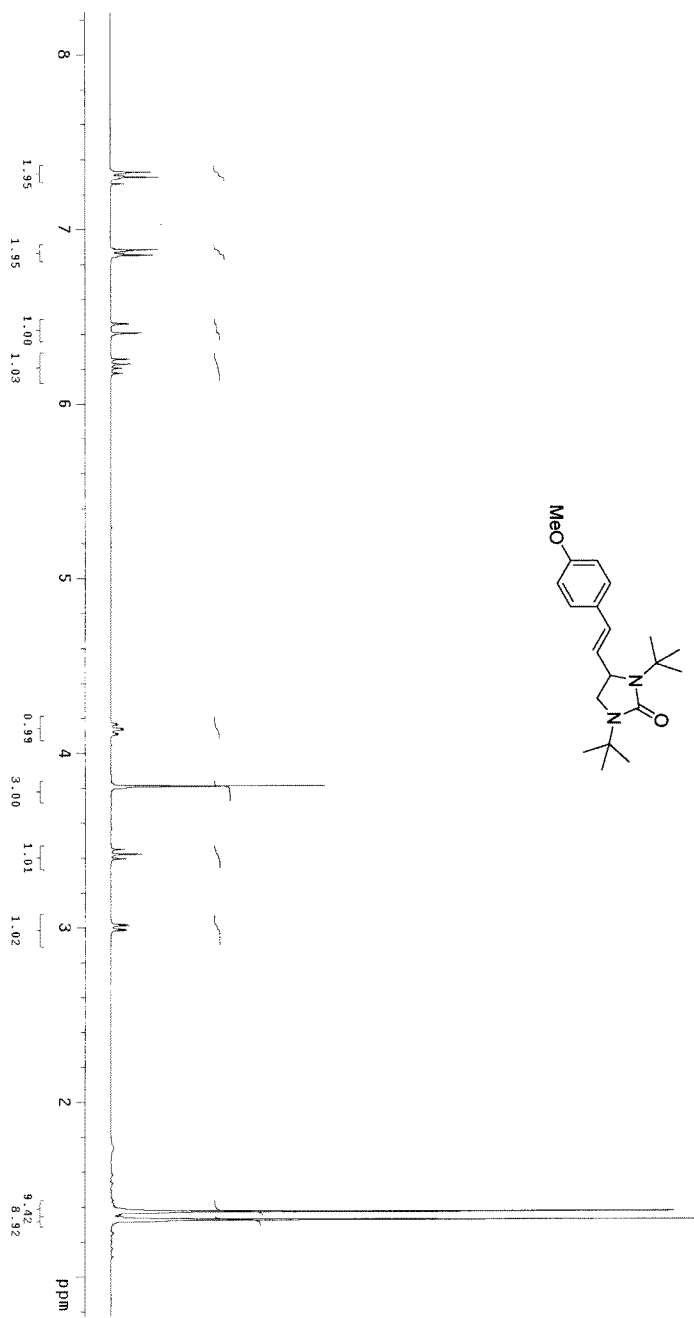

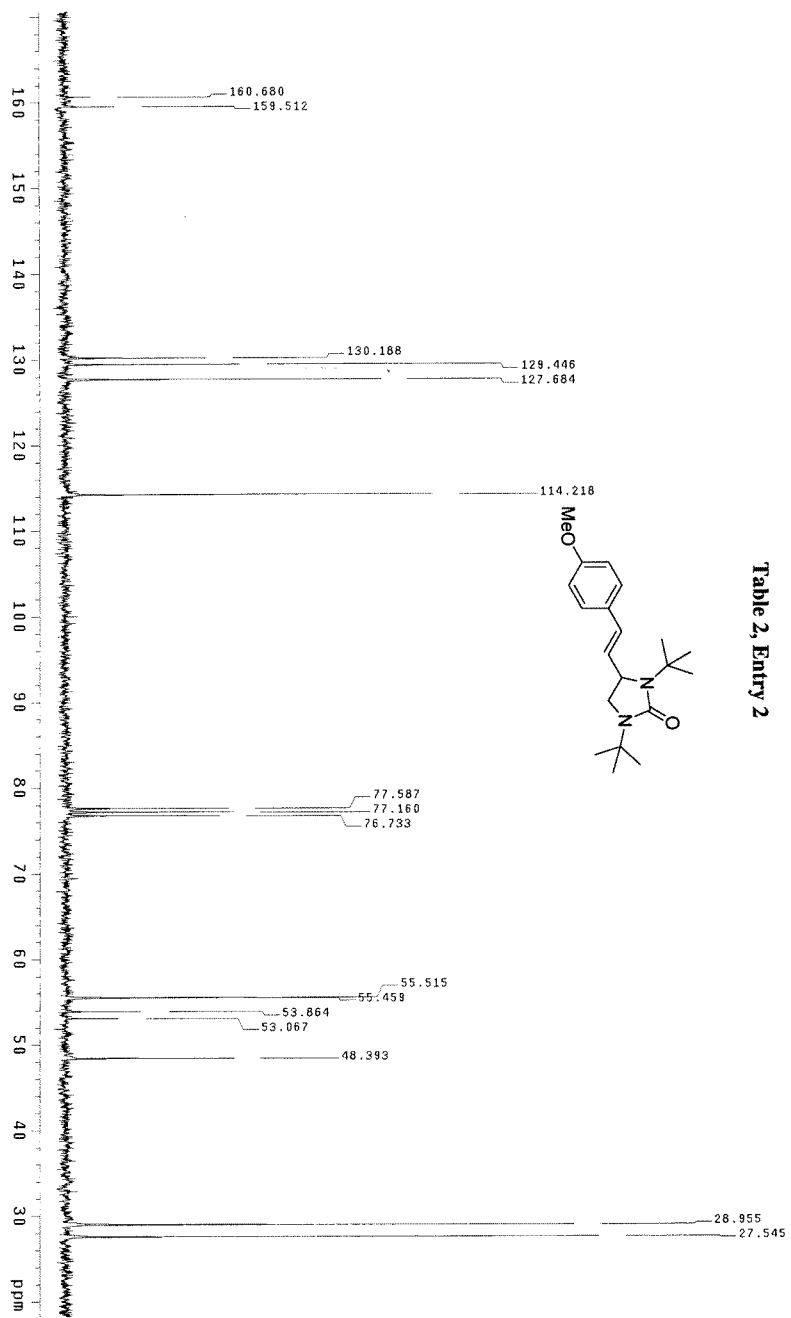

Table 2, Entry 3

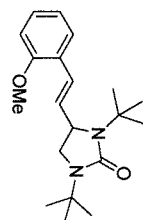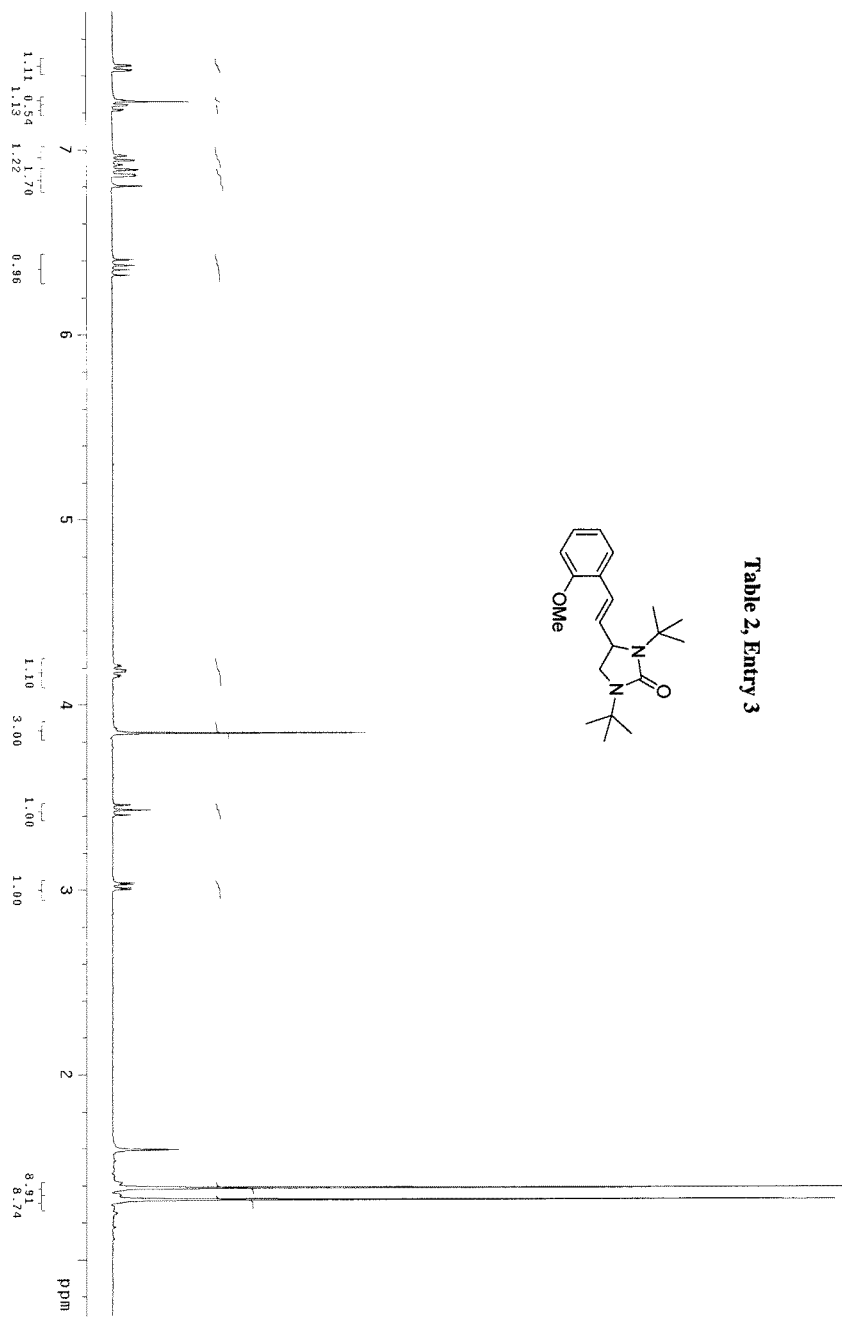

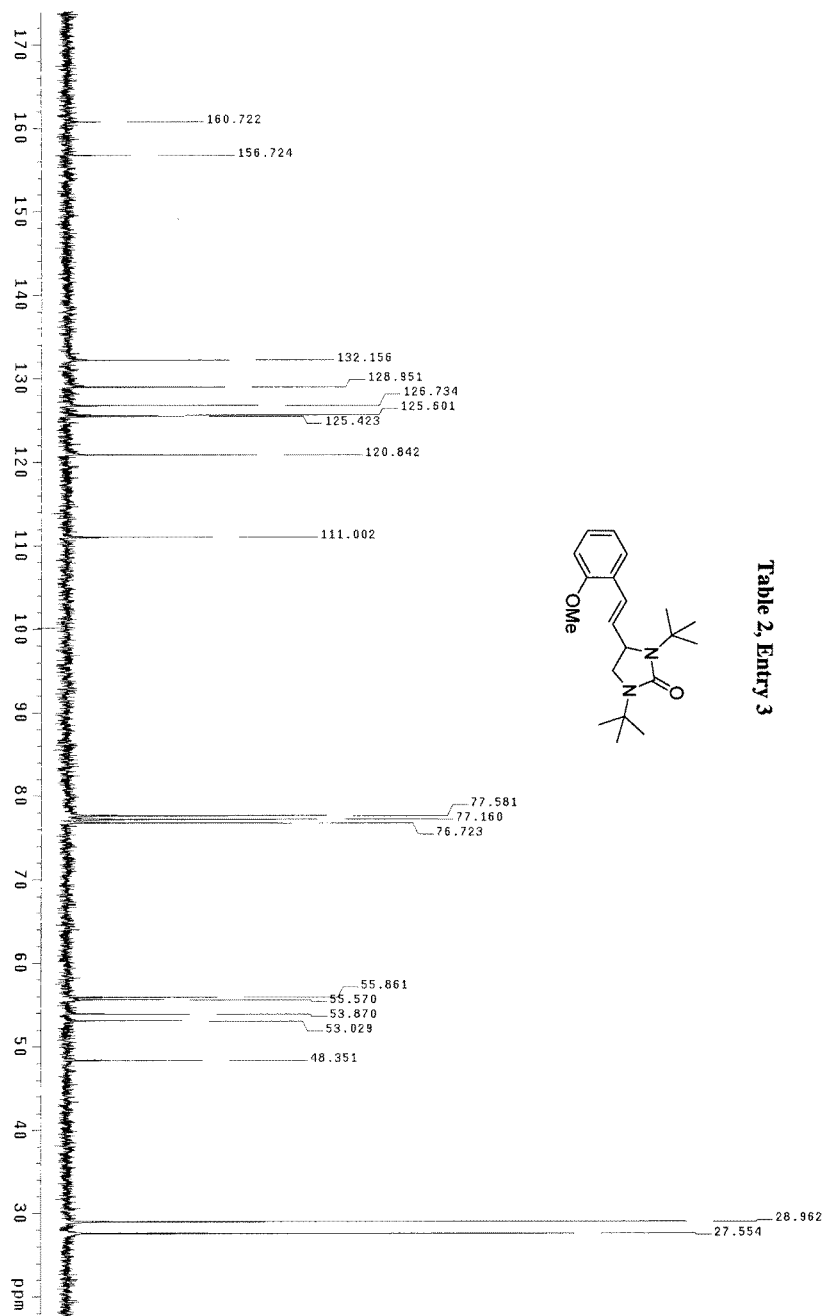

Table 2, Entry 4

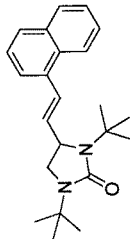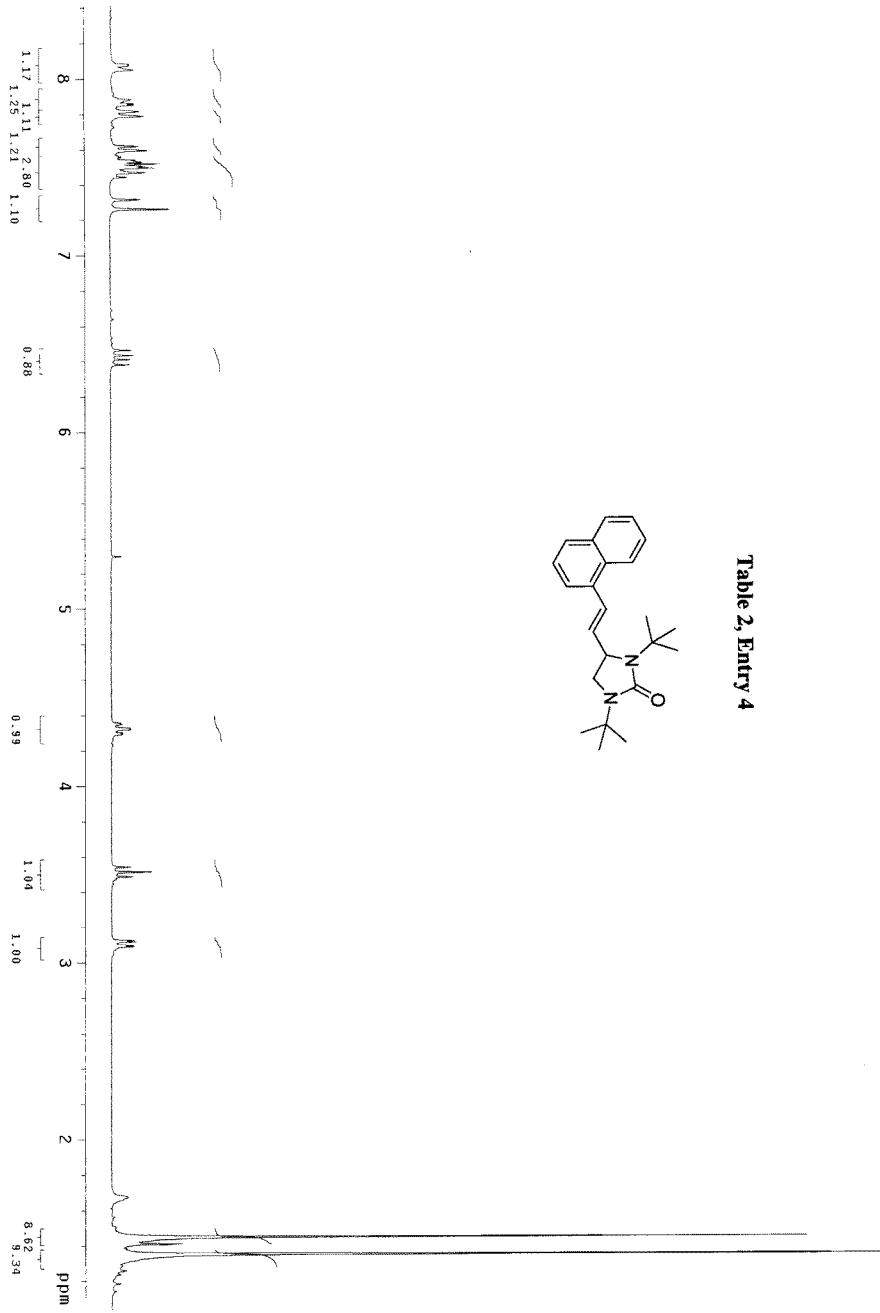

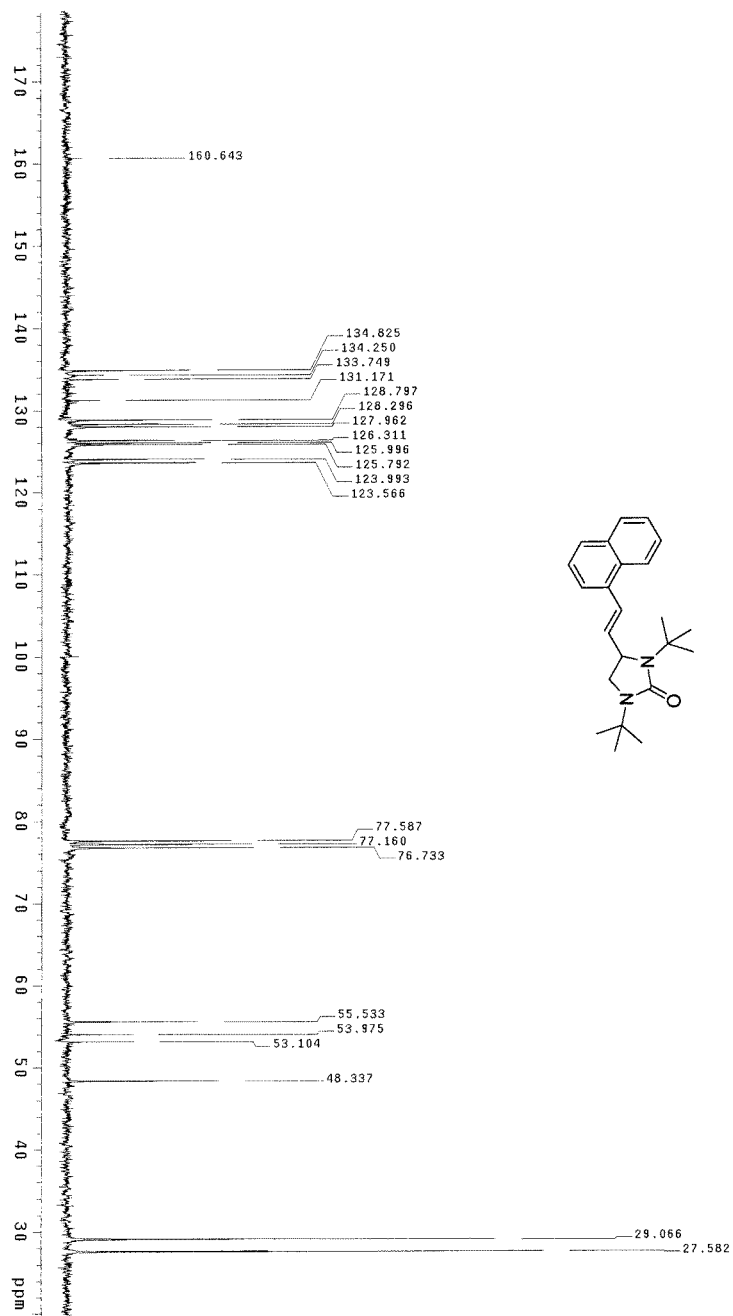

Table 2, Entry 5

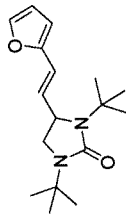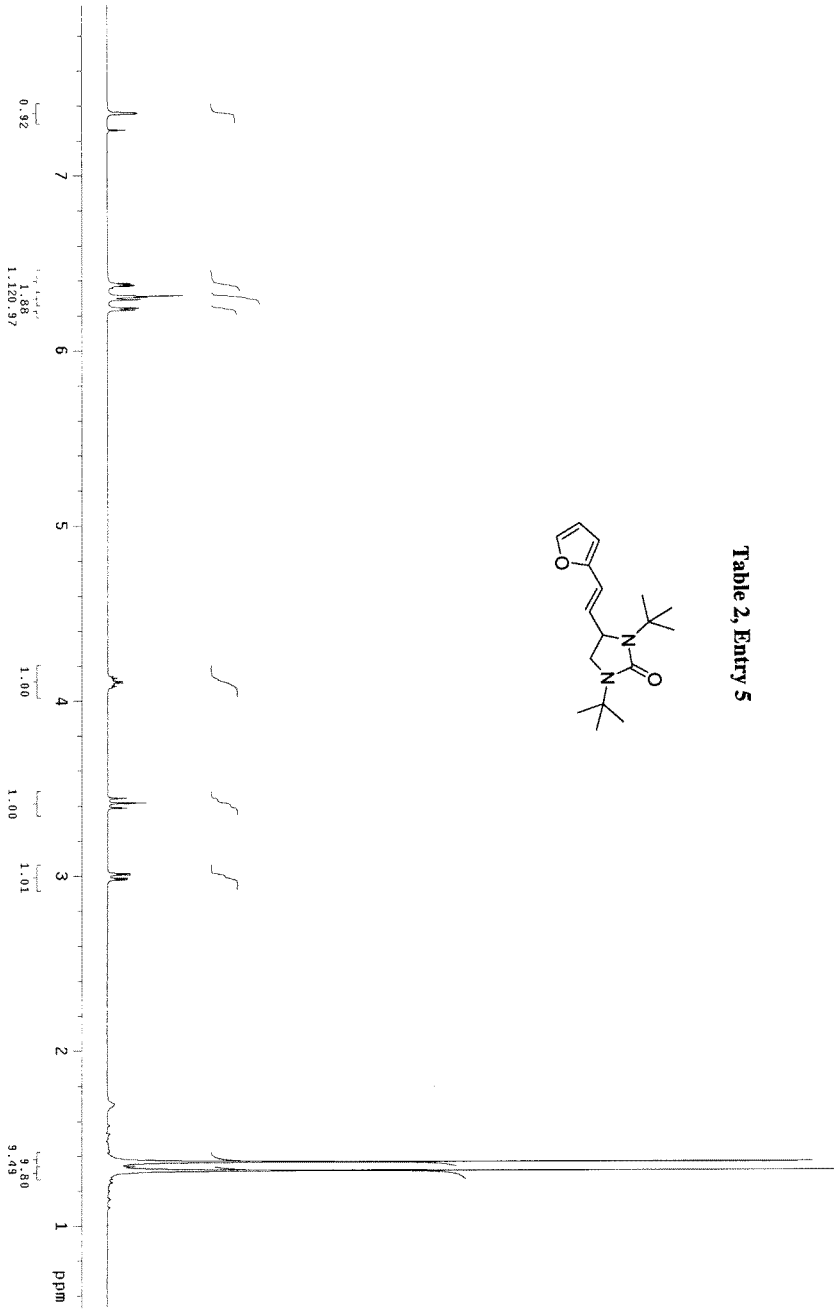



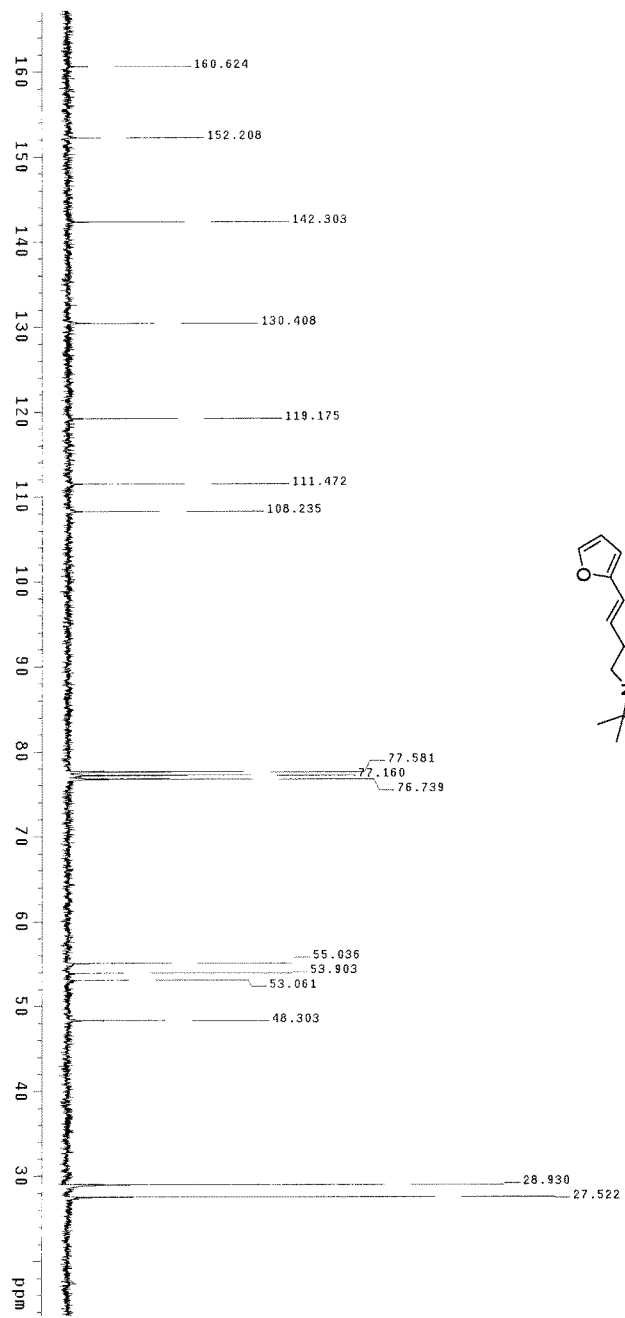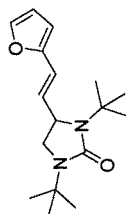

Table 2, Entry 5

Table 2, Entry 6

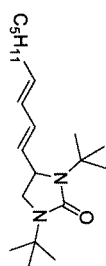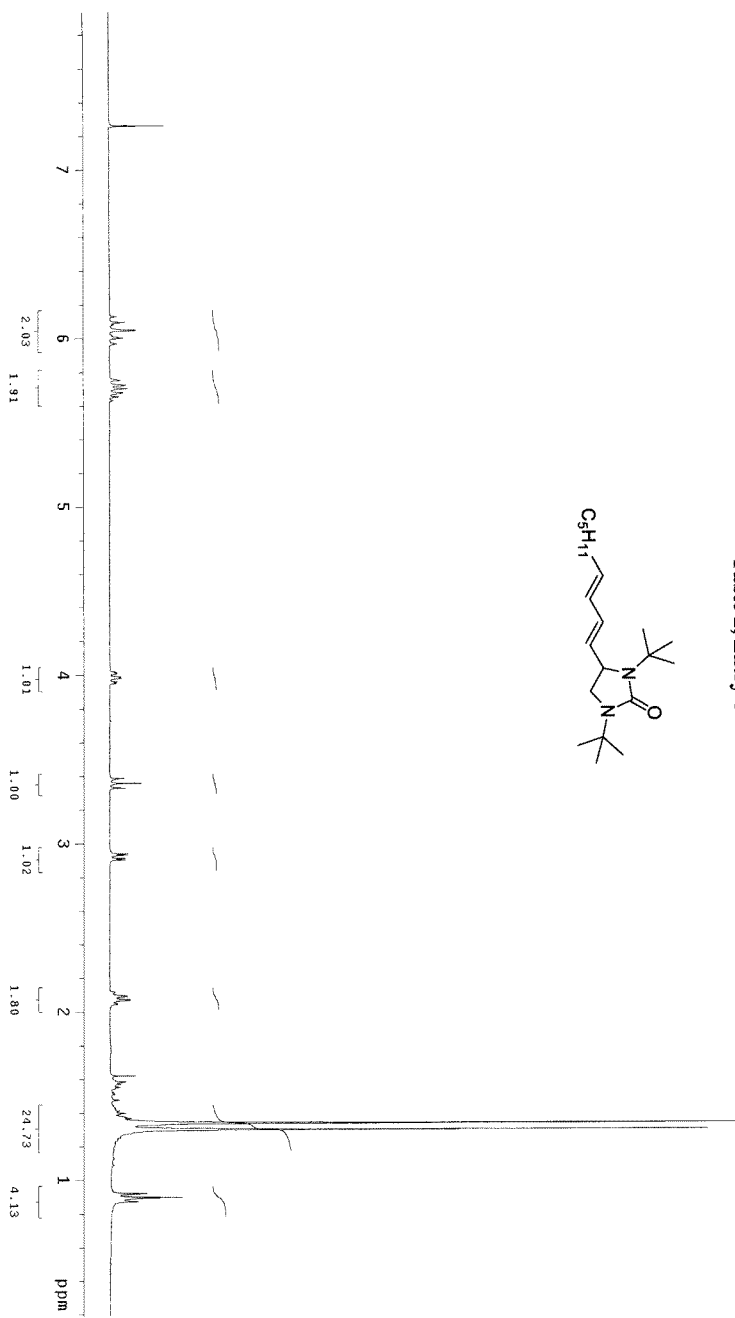

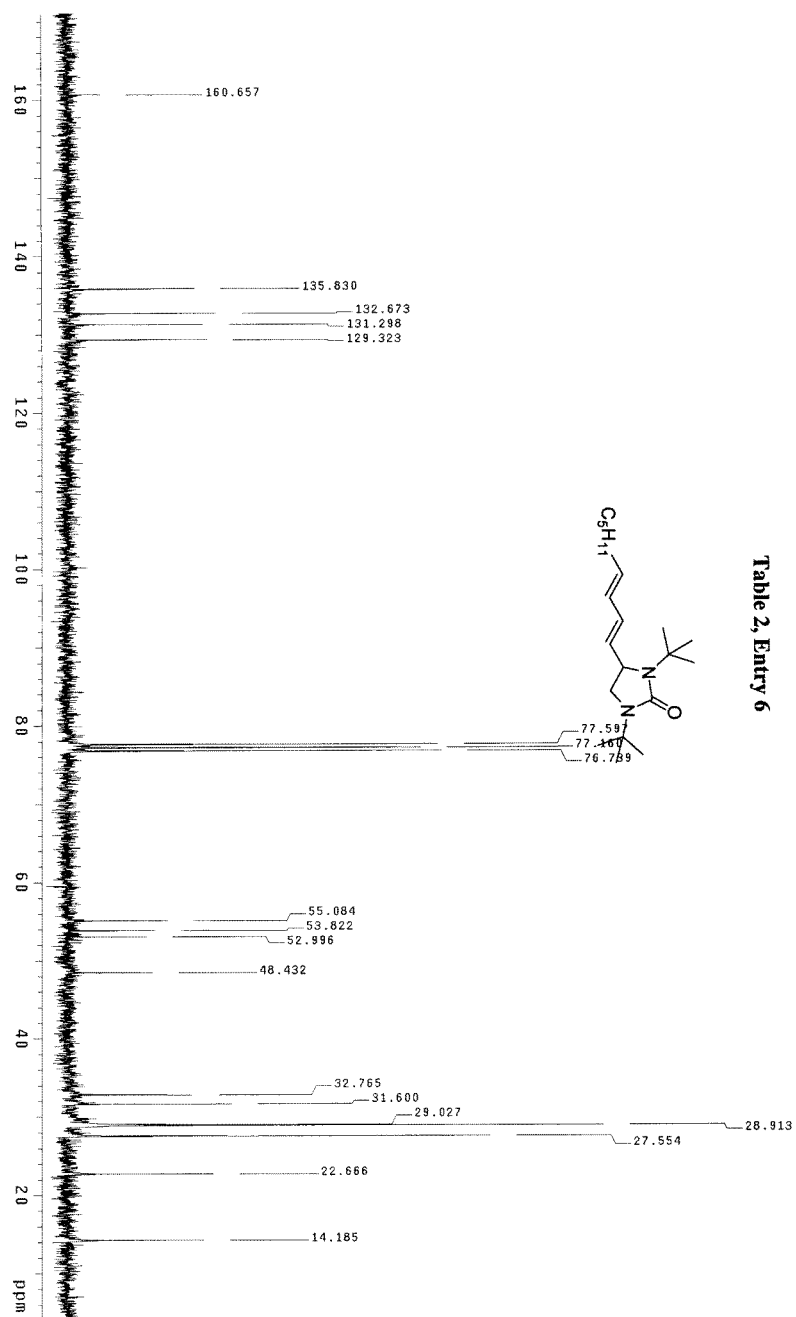

Supplement: NIHMS152796-supplement-1_si_001.pdf [file NIHMS152796-supplement-1_si_001.pdf]
